CORRECTION

# Correction: Cost Resulting from Anti-Tuberculosis Drug Shortages in the United States: A Hypothetical Cohort Study

James C. Scott, Neha Shah, Travis Porco, Jennifer Flood

The Funding section is incorrect. The complete, correct Funding statement is: TCP acknowledges support of the MIDAS study NIH NIGMS U01-GM087728. The funders had no role in study design, data collection and analysis, decision to publish, or preparation of the manuscript.

## Reference

1. Scott JC, Shah N, Porco T, Flood J (2015) Cost Resulting from Anti-Tuberculosis Drug Shortages in the United States: A Hypothetical Cohort Study. PLoS ONE 10(8): e0134597. doi:[10.1371/journal.pone.0134597](https://doi.org/10.1371/journal.pone.0134597) PMID: [26284924](https://pubmed.ncbi.nlm.nih.gov/26284924/)

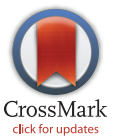

## OPEN ACCESS

**Citation:** Scott JC, Shah N, Porco T, Flood J (2015) Correction: Cost Resulting from Anti-Tuberculosis Drug Shortages in the United States: A Hypothetical Cohort Study. PLoS ONE 10(9): e0137812. doi:[10.1371/journal.pone.0137812](https://doi.org/10.1371/journal.pone.0137812)

**Published:** September 2, 2015

**Copyright:** © 2015 Scott et al. This is an open access article distributed under the terms of the [Creative Commons Attribution License](https://creativecommons.org/licenses/by/4.0/), which permits unrestricted use, distribution, and reproduction in any medium, provided the original author and source are credited.
